# Supplementary material for: Sulfaguanidine nanofiltration active layer towards anti-adhesive and antimicrobial attributes for desalination and dye removal
Source: Royal Society of Chemistry journal article supplement (doi:10.1039/c9ra03340h), 2019-01-01
Supplement: c9ra03340h1.pdf [file c9ra03340h1.pdf]

## Supporting Information

### **Sulfaguanidine Nanofiltration Active Layer towards Anti-adhesive and Antimicrobial Attributes for Desalination and Dyes Removal**

*Hong-Li Zhang,<sup>&†</sup> Bing-Hua Liu,<sup>&‡</sup> Mingbo Yang,<sup>§</sup> Pan Zhang,<sup>†</sup> Jing-Gang Gai<sup>1,†</sup>*

*<sup>†</sup> State Key Laboratory of Polymer Materials Engineering, Polymer Research Institute,  
Sichuan University, Chengdu, Sichuan 610065, China*

*<sup>§</sup> College of Polymer Science and Engineering, State Key Laboratory of Polymer  
Materials Engineering, Sichuan University, Chengdu, Sichuan 610065, P. R. China*

*<sup>‡</sup> Laboratory of molecular biology, College of Medicine, Chengdu University,  
Chengdu 610106, PR China*

#### **1. Figures and Tables**

**Table S1** Surface elemental composition of the SG-Xs.

| <b>Sample</b> | <b>C(%)</b> | <b>O(%)</b> | <b>N(%)</b> | <b>S(%)</b> | <b>C/O</b> | <b>N/O</b> | <b>S/O</b> |
|---------------|-------------|-------------|-------------|-------------|------------|------------|------------|
| SG-0          | 71.94       | 17.18       | 10.89       | /           | 4.19       | 0.63       | /          |
| SG-0.05       | 72.77       | 16.33       | 10.51       | 0.39        | 4.46       | 0.64       | 0.024      |
| SG-0.1        | 74.26       | 14.64       | 10.56       | 0.55        | 5.07       | 0.72       | 0.038      |

<sup>1</sup>Corresponding authors. Tel.: +86 28 85467166; fax: +86 28 85402465. E-mail addresses:  
[gaijinggang@scu.edu.cn](mailto:gaijinggang@scu.edu.cn) (J-G. Gai)

<sup>&</sup>These authors contributed equally to this work and should be considered co-first authors

|        |       |       |       |      |      |      |       |
|--------|-------|-------|-------|------|------|------|-------|
| SG-0.3 | 73.03 | 13.92 | 11.88 | 1.32 | 5.25 | 0.85 | 0.095 |
| SG-0.4 | 72.14 | 14.35 | 12.19 | 1.35 | 5.03 | 0.83 | 0.094 |
| SG-0.5 | 74.10 | 13.58 | 10.95 | 1.37 | 5.46 | 0.81 | 0.100 |

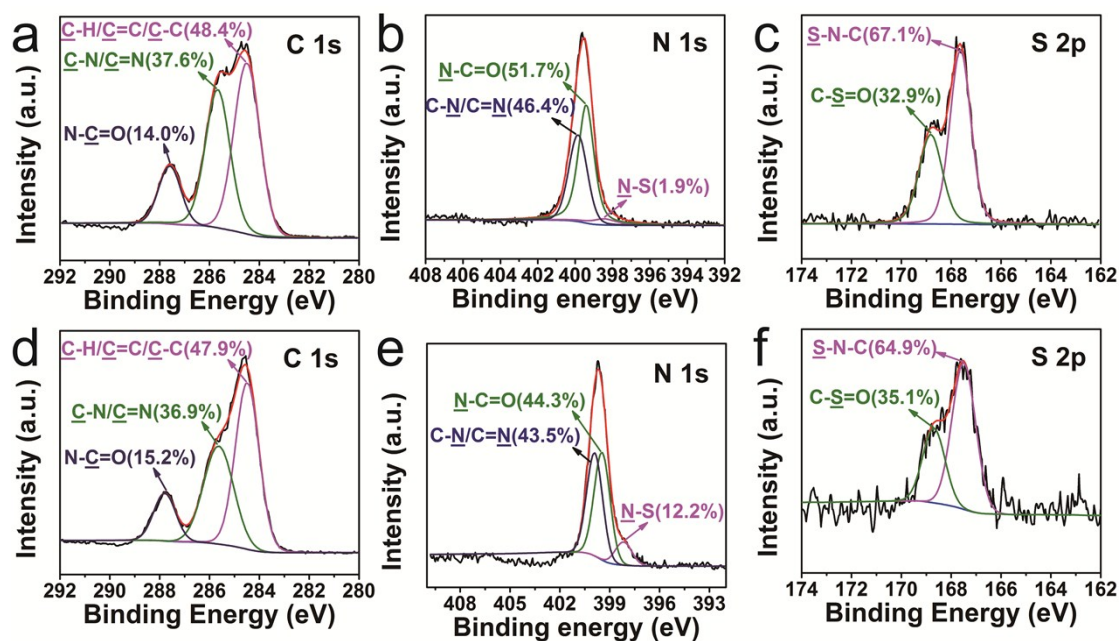

**Figure S1** XPS survey spectra C 1s a), N 1s b) and S2p c) core-level spectra for SG-0.05 membrane; C 1s d), N 1s e) and S2p f) core-level spectra for SG-0.5 membrane.

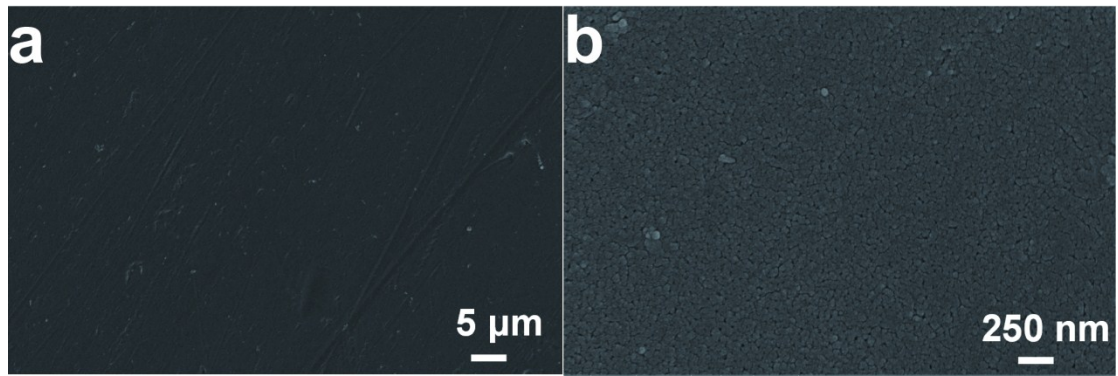

**Figure S2** The surface SEM images of polysulfone (PSf) support membrane morphology.

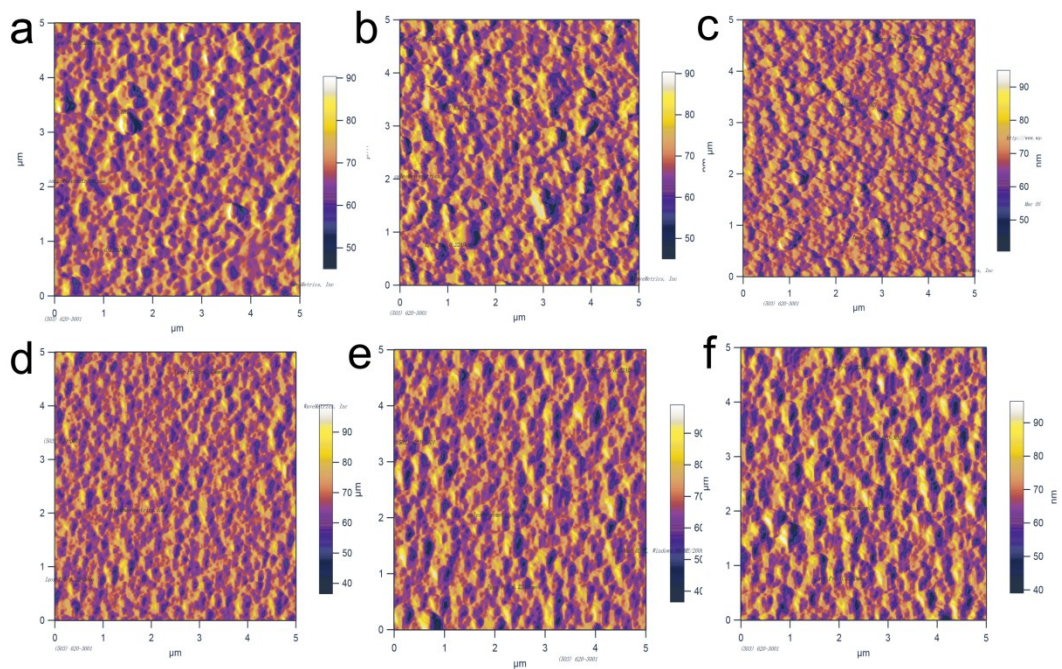

**Figure S3** AFM topographical images of SG-0 a), SG-0.05 b), SG-0.1 c), SG-0.3 d), SG-0.4 e) and SG-0.5 f) layers.

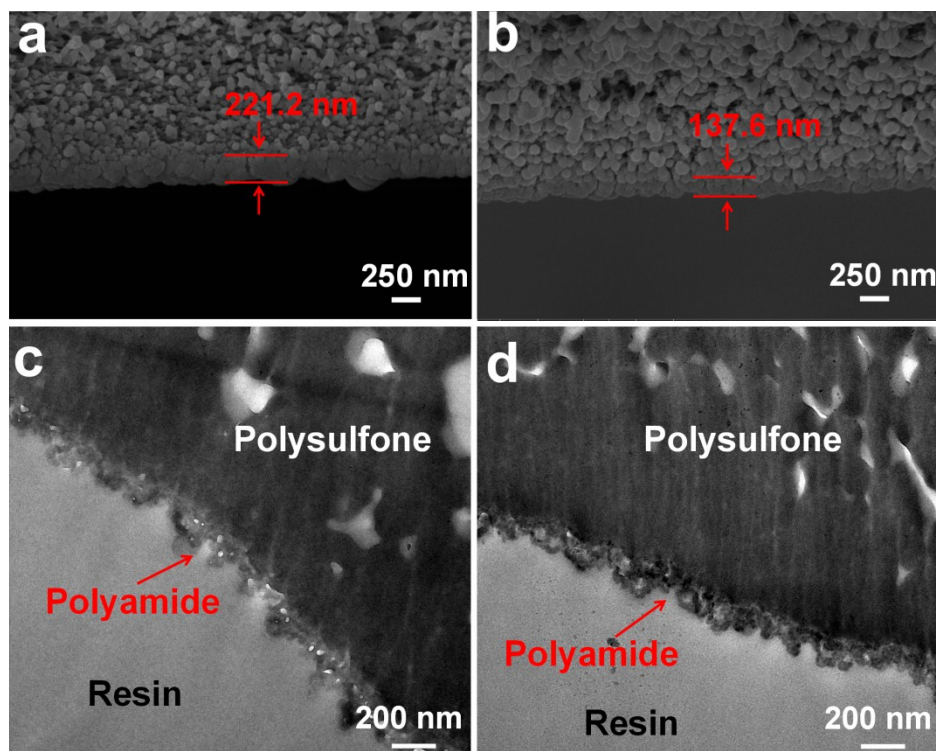

**Figure S4** The cross sectional SEM images of SG-0.05 a) and SG-0.5 b) membranes, and the cross sectional TEM images of SG-0.05 c) and SG-0.5 d) membranes.

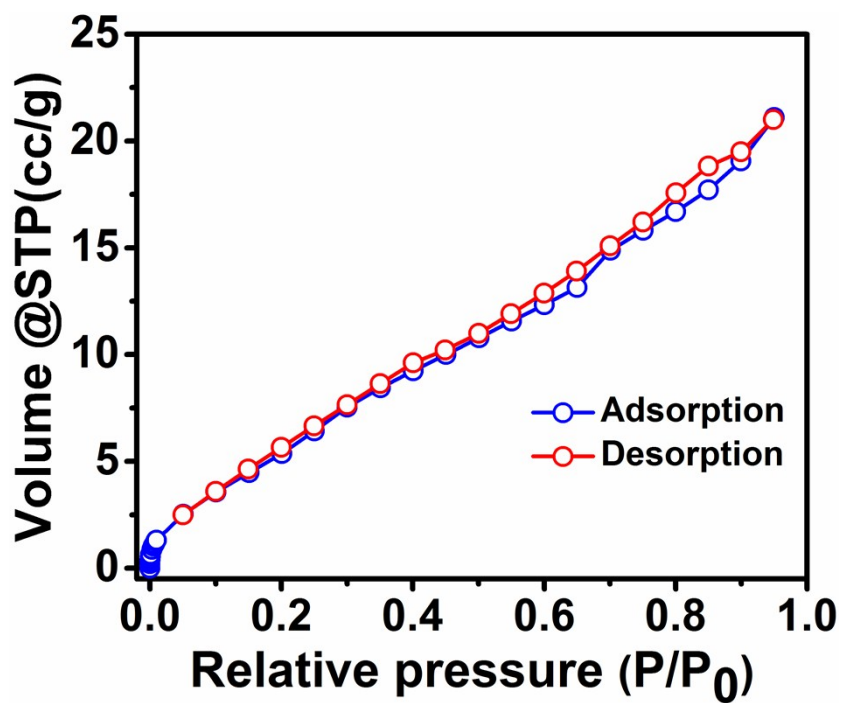

**Figure S5** Nitrogen adsorption-desorption isotherm of the SG-0 membrane.

**Table S2** Stokes radius and diameters of PEG molecules.

| Solute  | $M_w$ (g/mol) | $r_s$ (nm) | $d_s$ (nm) |
|---------|---------------|------------|------------|
| PEG200  | 200           | 0.320      | 0.640      |
| PEG400  | 400           | 0.471      | 0.942      |
| PEG600  | 600           | 0.590      | 1.180      |
| PEG1000 | 1000          | 0.784      | 1.568      |

**Table S3** Performance comparison of SG-0.3 with the state-of-the-art NF membranes towards different salts rejection.

| Membrane                                 | PWP(L m <sup>-2</sup> h <sup>-1</sup> bar <sup>-1</sup> ) | R (%)                           |             | Feed Concentration(g L <sup>-1</sup> ) | Operating Pressure (bar) | Ref.                    |
|------------------------------------------|-----------------------------------------------------------|---------------------------------|-------------|----------------------------------------|--------------------------|-------------------------|
|                                          |                                                           | Na <sub>2</sub> SO <sub>4</sub> | NaCl        |                                        |                          |                         |
| <b>SG-0.3</b>                            | <b>16.8</b>                                               | <b>98.3</b>                     | <b>34.6</b> | <b>2</b>                               | <b>6</b>                 | <b><i>This work</i></b> |
| NF-270 (polyamide)                       | 11.6                                                      | 94.0                            | 51.0        | 2                                      | 10                       | S1                      |
| NF-PDA /PEI/PAA                          | 5.5                                                       | 98.3                            | 59.0        | 1                                      | 5                        | S2                      |
| PIP/NH <sub>2</sub> -PEG-NH <sub>2</sub> | 5.8                                                       | 99.5                            | 58.3        | 2                                      | 6                        | S3                      |

|                               |       |       |       |      |    |    |
|-------------------------------|-------|-------|-------|------|----|----|
| PIP/MWCNT-OH                  | 6.9   | 97.6  | 35.3  | 2    | 6  | 44 |
| PIP-TMC/GO-COCl               | 3.77  | 97.1  | 57.2  | 1    | 6  | S4 |
| PIP& ABA                      | 11.9  | 93.15 | 15.55 | 1    | 6  | 45 |
| PIP/Sericin <sup>b</sup> -TMC | 16.4  | 97.3  | 32.0  | 0.5  | 5  | S5 |
| GO (PA)                       | 1.47  | 94.0  | 89.0  | 2    | 15 | S6 |
| brGO-PVDF/CE                  | 21.8  | 60    |       | 2.84 | 5  | 7  |
| ZIF-8 TFC NF                  | 53.5  | 95    | 11    | 1    | 4  | S7 |
| GO-PSBMA (PES)                | 11.98 | 10    | 4     | 1    | 4  | 16 |
| GO (NFM)                      | 11.13 | 63.13 | 27.86 | 2.84 | 1  | S8 |

**Table S4** Dye molecules and their properties.

| Dye molecule         | $M_W$ (g/mol) | Molecule Size*  | $\lambda_{max}$ (nm) | Charge |
|----------------------|---------------|-----------------|----------------------|--------|
| Methyl orange (MO)   | 327.33        | 1.13 nm×0.42 nm | 464                  | -      |
| Chrome black T (CBT) | 461.38        | 1.55 nm×0.88 nm | 541                  | -      |
| Rhodamine B (RB)     | 479.02        | 1.20 nm×1.13 nm | 554                  | +      |
| Congo red (CR)       | 696.66        | 2.56 nm×0.73 nm | 504                  | -      |

|                  |        |                 |     |   |
|------------------|--------|-----------------|-----|---|
| Methyl blue (MB) | 799.80 | 2.36 nm×1.74 nm | 584 | - |
|------------------|--------|-----------------|-----|---|

Note: \*Molecule size was measured by Materials Studio 8.0 and quoted from references.<sup>[S9-S10]</sup>

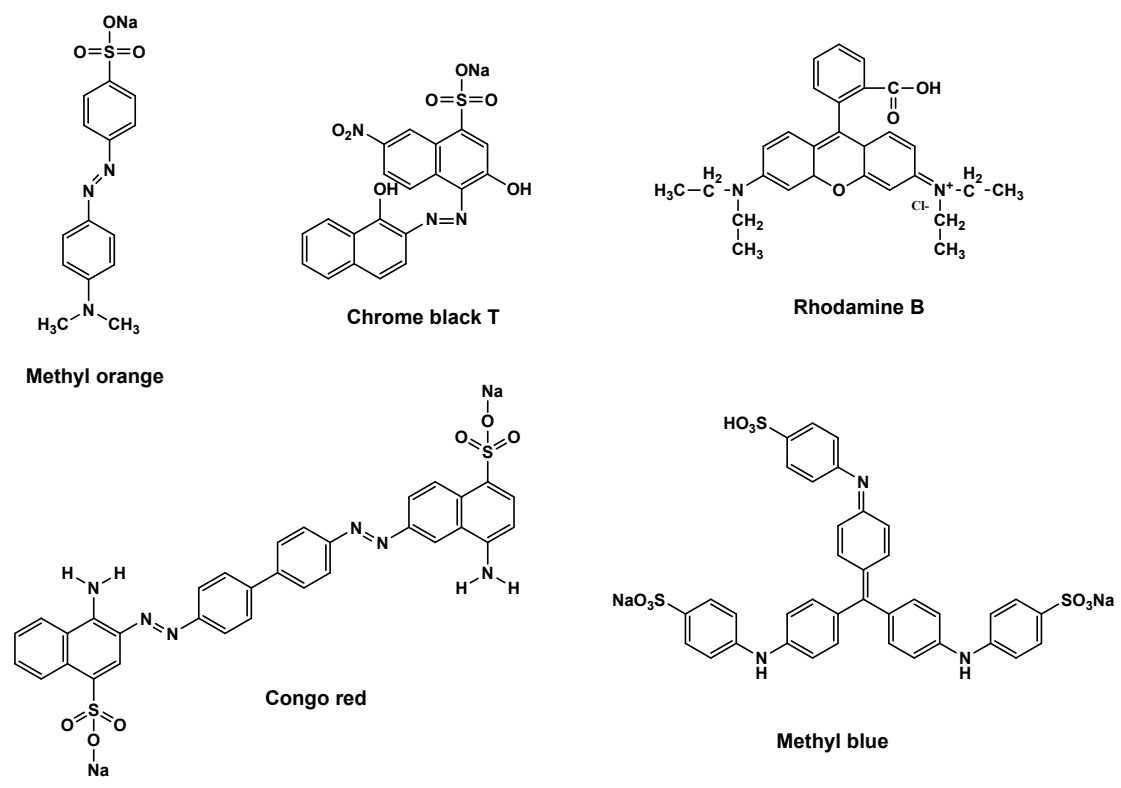

Figure S6 Chemical structural formula of dyes.

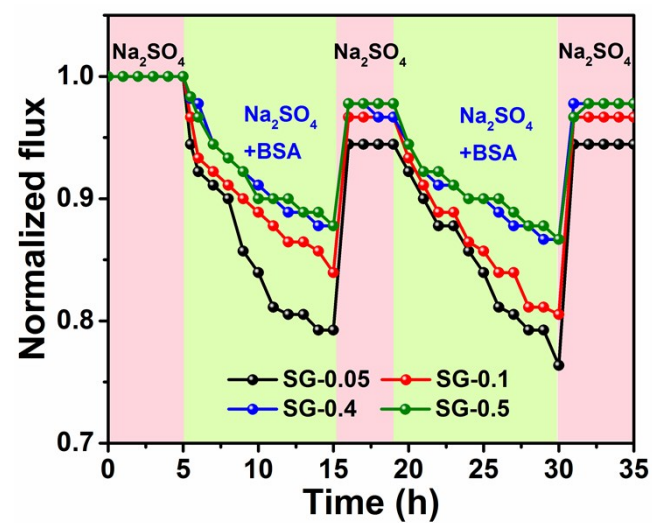

Figure S7 Time-dependent relative water flux of other fabricated membranes tested with 2 g L<sup>-1</sup> Na<sub>2</sub>SO<sub>4</sub> and 2 g L<sup>-1</sup> Na<sub>2</sub>SO<sub>4</sub> + 1 g L<sup>-1</sup> BSA aqueous solution at 25 °C and 6

bar.

## 2. References

(1) Peng, F. B.; Huang, X. F.; Jawor, A.; Hoek, E. M. V. Transport, Structural, and Interfacial Properties of Poly(vinyl alcohol)-polysulfone Composite Nanofiltration Membranes. *J. Membr. Sci.* **2010**, 353, 169-176.

(2) Chen, Y.; Liu, F.; Wang, Y.; Lin, H.; Han, L. A Tight Nanofiltration Membrane with Multi-charged Nanofilms for High Rejection to Concentrated Salts. *J. Membr. Sci.* **2017**, 537, 407-415.

(3) Tang, Y. J.; Xu, Z. L.; Xue, S. M.; Wei, Y. M.; Yang, H. Improving the Chlorine-tolerant Ability of Polypiperazine-amide Nanofiltration Membrane by Adding NH<sub>2</sub>-PEG-NH<sub>2</sub> in the Aqueous Phase. *J. Membr. Sci.* **2017**, 538, 9-17.

(4) Lim, M. Y.; Choi, Y. S.; Kim, J.; Kim, K.; Shin, H.; Kim, J. J.; Shin, D. M.; Lee, J. C. Cross-linked Graphene Oxide Membrane Having High Ion Selectivity and Antibacterial Activity Prepared Using Tannic Acid-functionalized Graphene Oxide and Polyethyleneimine. *J. Membr. Sci.* **2017**, 521, 1-9.

(5) Pan, Y.; Xu, R.; Lü, Z.; Yu, S.; Liu, M.; Gao, C. Enhanced both Perm-selectivity and Fouling Resistance of Poly(piperazineamide) Nanofiltration Membrane by Incorporating Sericin as A Co-reactant of Aqueous Phase. *J. Membr. Sci.* **2017**, 523, 282-290.

(6) Bano, S.; Mahmood, A.; Kim, S. J.; Lee, K. H. Graphene Oxide Modified



Polyamide Nanofiltration Membrane with Improved Flux and Antifouling Properties.

*J. Mater. Chem. A* **2015**, 3(5), 2065-2071.

(7) Wang, Z.; Wang, Z.; Lin, S.; Jin, H.; Gao, S.; Zhu, Y.; Jin, J. Nanoparticle-templated Nanofiltration Membranes for Ultrahigh Performance Desalination. *Nat. Commun.* **2018**, 9(1), 2004.

(8) Chen, L.; Moon, J. H.; Ma, X.; Zhang, L.; Chen, Q.; Chen, L.; Peng, R.; Si, P.; Feng, J.; Li, Y.; Lou, J.; Ci, L. High Performance Graphene Oxide Nanofiltration Membrane Prepared by Electrospraying for Wastewater Purification. *Carbon* **2018**, 130, 487-494.

(9) Kandambeth, S.; Biswal, B. P.; Chaudhari, H. D.; Rout, K. C.; Kunjattu, H.; Mitra, S.; Karak, S.; Das, A.; Mukherjee, R.; Kharul, U. K.; Banerjee, R. Selective Molecular Sieving in Self-standing Porous Covalent-organic-framework Membranes. *Adv. Mater.* **2017**, 29(2), 1603945.

(10) Karan, S.; Jiang, Z.; Livingston, A. G. Sub-10 nm Polyamide Nanofilms with Ultrafast Solvent Transport for Molecular Separation. *Science* **2015**, 348(6241), 1347-1351.
